# Supplementary material
Source: Springer Nature journal article supplement (https://www.springermedizin.de/resource/supplementary/12905_2013_397_MOESM1_ESM.pdf/9518676)
Supplement: MOESM1 [file 9518676]

Female participants of the Malmö  
Diet and Cancer Study (MDCS)  
**n=17 035**

Enrolled in MDCS before Feb 17,  
1992 (did not complete baseline  
questionnaire - version 2)  
**n=1 556**

Not included in Malmö  
mammography register  
**n=1 830**

Invited to attend Malmö  
mammography screening program  
**n=13 649**

Not invited to screening  
between 1992 and 2009  
**n=1 869**

Diagnosed with breast cancer  
prior to screening  
**n=371**

Final analytic cohort  
**n=11 409**
